# Supplementary material for: In situ hard X-ray microscopy of self-assembly in colloidal suspensions
Source: Royal Society of Chemistry journal article supplement (doi:10.1039/c3ra41223g), 2013-01-01

# In-situ hard x-ray microscopy of self-assembly in colloidal suspensions

Dmytro V. Byelov<sup>\*a</sup>, Janne-Mieke Meijer,<sup>a</sup> Irina Snigireva<sup>b</sup>, Anatoly Snigirev<sup>b</sup>, Laura Rossi<sup>a</sup>, Esther van den Pol<sup>a</sup>, Anke Kuijk<sup>c</sup>, Albert Philipse<sup>a</sup>, Arnout Imhof<sup>c</sup>, Alfons van Blaaderen<sup>c</sup>, Gert Jan Vroege<sup>a</sup> and Andrei V. Petukhov<sup>a</sup>

This supplementary information provides extended schematic representation of the  $\mu$ radXRD and the TXM setups and intensity profiles of the diffraction patterns in Figs 3-8 of the main text.

Fig. S1

## $\mu$ radXRD setup

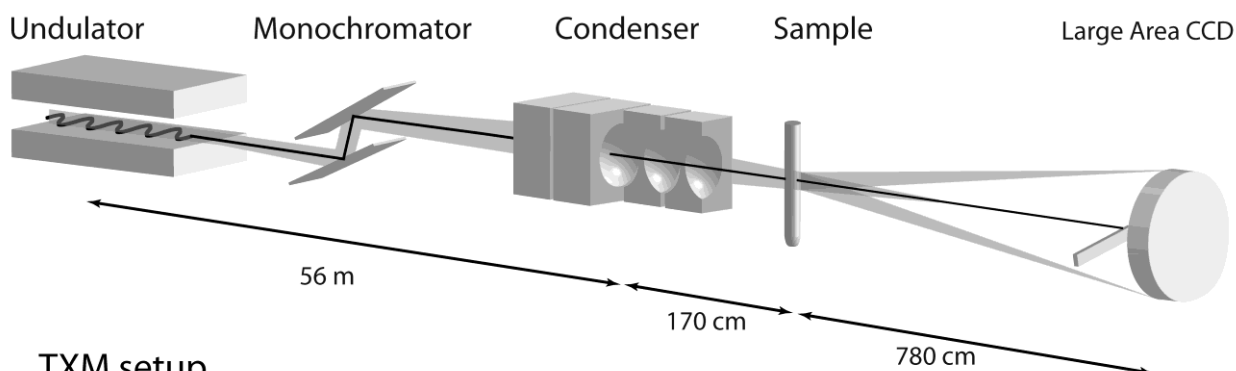

## TXM setup

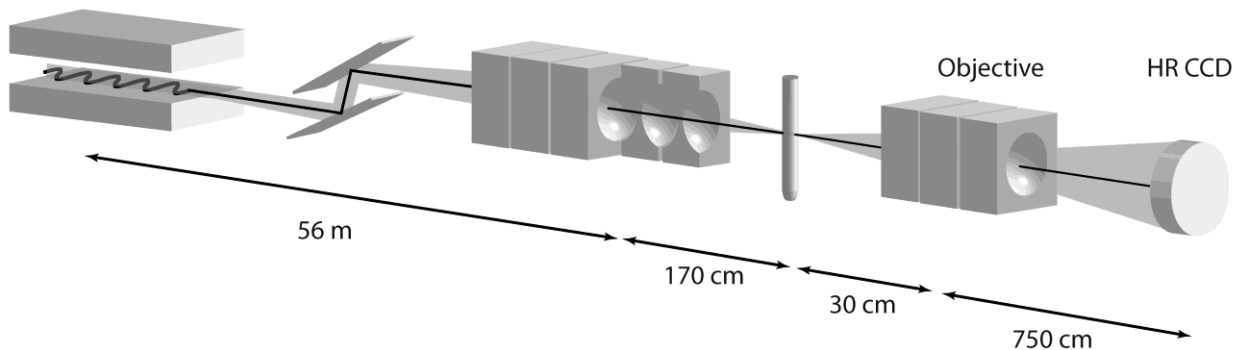

Fig. S2.  $I(q)$  profiles corresponding to Fig. 3A. Red squares correspond to vertical cut of the 2D pattern, green circles to horizontal cut.

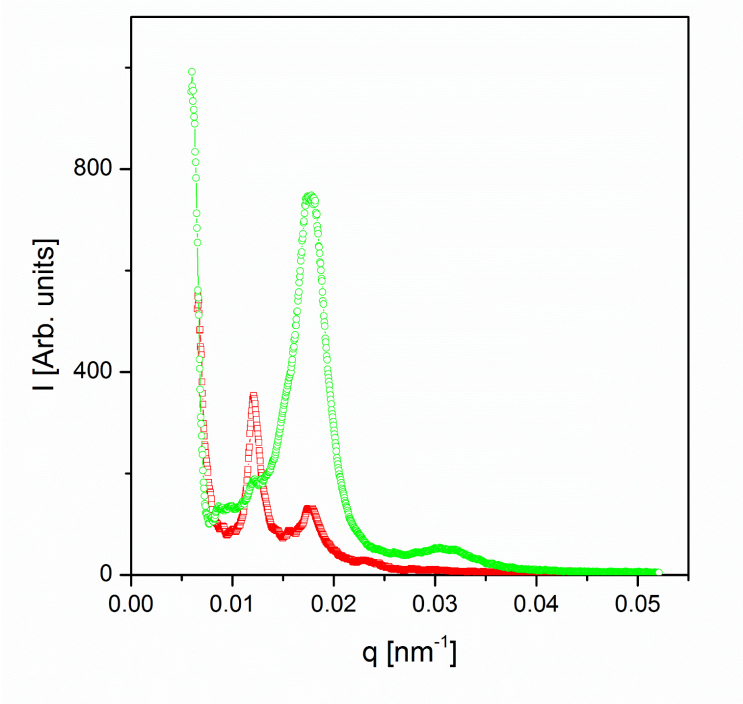

Fig. S3.  $I(q)$  profiles corresponding to Fig. 4A. Red squares is a cut of the 2D pattern through peaks originating from the smectic ordering in the system. Green circles is a cut through the broad peak.

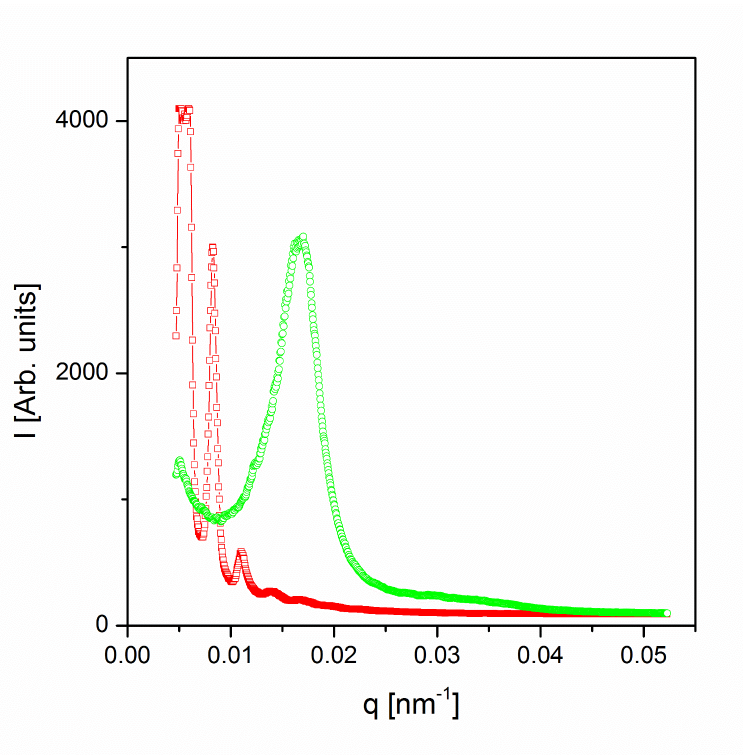

Fig. S4.  $I(q)$  profiles corresponding to Fig. 5A. Red squares correspond to the horizontal cut, green circles to the vertical cut.

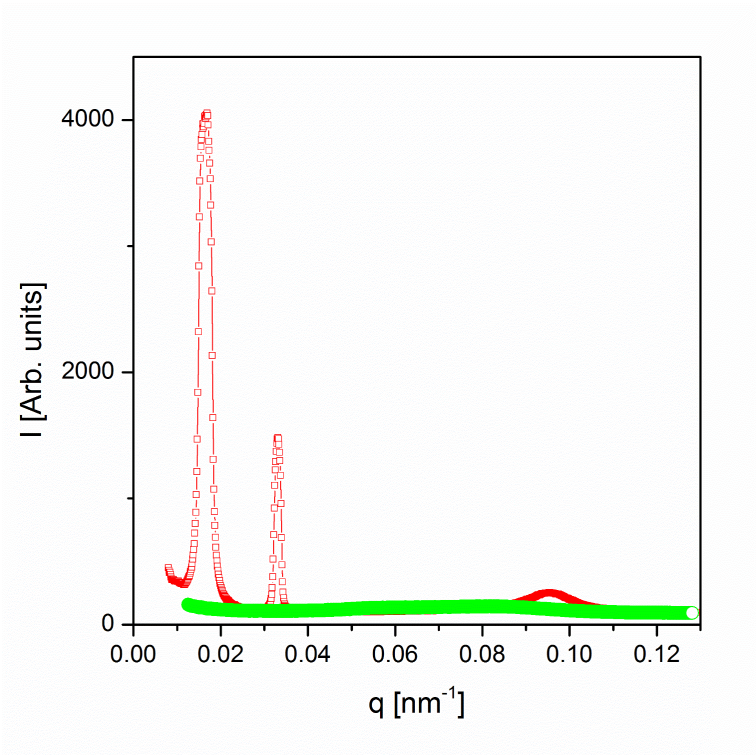

Fig. S5.  $I(q)$  profiles corresponding to Fig. 6A. Red squares is a cut through horizontal peaks, green circles is a cut from vertical peaks. Blue triangles and orange stars are cuts through higher order peaks.

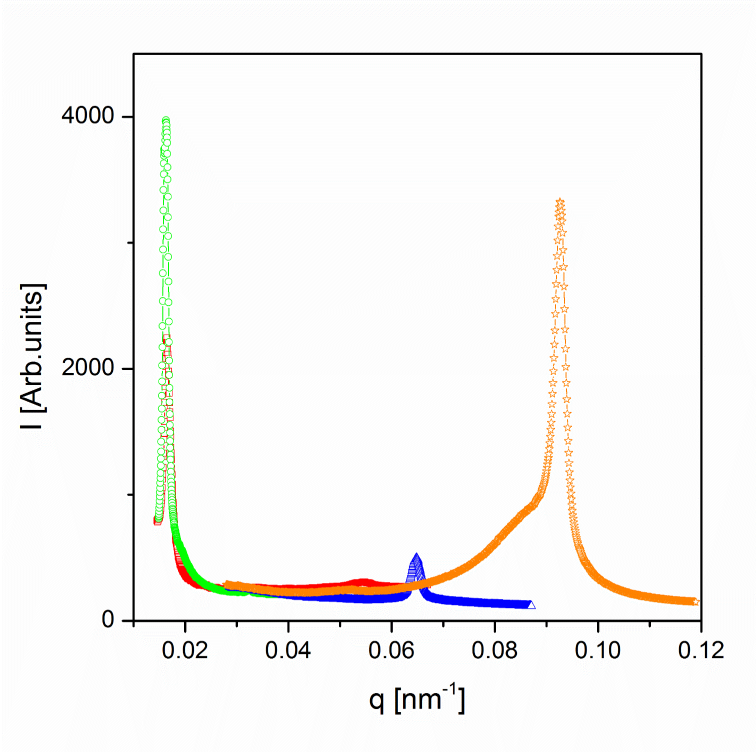

Fig. S6. I(q) profiles corresponding to Fig. 7A. Red squares is a cut through vertical peaks, green circles is a diagonal cut.

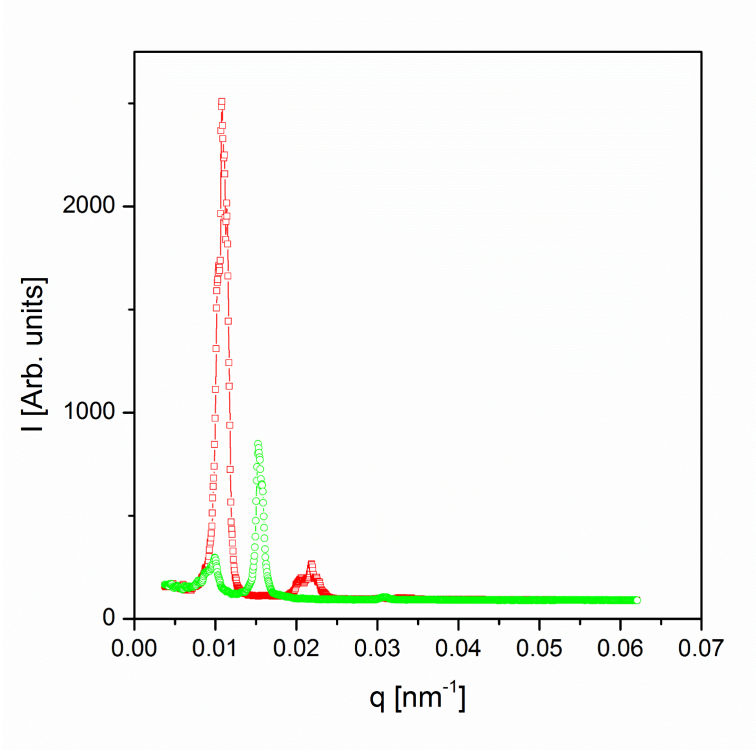

Fig. S7. I(q) profiles corresponding to Fig. 8A. Red squares is a cut through horizontal peaks, green circles is a cut from vertical peaks. Blue triangles and orange stars are cuts through higher order peaks. Blue triangles – diagonal cut.

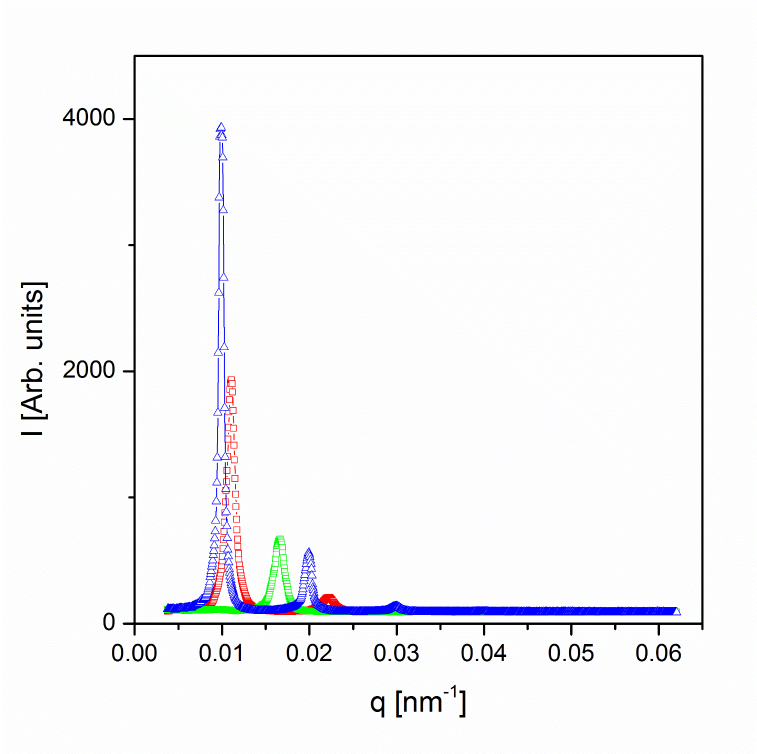

Supplement: c3ra41223g.pdf [file c3ra41223g.pdf]
